# Supplementary material for: Copper immobilized onto a triazole functionalized magnetic nanoparticle: a robust magnetically recoverable catalyst for “click” reactions
Source: Royal Society of Chemistry journal article supplement (doi:10.1039/c4ra13330g), 2014-11-28
Supplement: c4ra13330g1.pdf [file c4ra13330g1.pdf]

## *Supporting Information*

# **Copper Immobilized Onto the Triazole Functionalized Magnetic Nanoparticle: A Robust Magnetically Recoverable Catalyst for “Click” Reaction**

Firouz Matloubi Moghaddam\*, Seyed Ebrahim Ayati

*Laboratory of Organic Synthesis and Natural Products, Department of Chemistry,  
Sharif University of Technology, Azadi Street, PO Box 111559516  
Tehran, Iran*

*E-mail Address: matloubi@sharif.edu*

## CONTENTS

|                                                                         |      |
|-------------------------------------------------------------------------|------|
| General data.....                                                       | II   |
| General procedure for the synthesis of triazole .....                   | II   |
| TEM images before and after catalyst recovery .....                     | III  |
| Spectroscopic characterization of products.....                         | III  |
| <sup>1</sup> H-NMR and <sup>13</sup> C-NMR spectra of the products..... | VIII |
| References.....                                                         | XXII |

### *1. General remarks*

All materials used are commercially available and were purchased from Merck and used without any additional purification.  $^1\text{H}$  NMR and  $^{13}\text{C}$  NMR spectra were recorded on a Bruker (Avance DRX-500) spectrometer using  $\text{CDCl}_3$  as solvent at room temperature. Chemical shifts  $\delta$  were reported in ppm relative to tetramethylsilane as an internal standard. FTIR spectra of samples were taken using an ABB Bomem MB-100 FTIR spectrophotometer. The morphology of the catalyst was observed using a Philips XL30 scanning electron microscope (SEM), Thermogravimetric analysis (TGA) was acquired under a nitrogen atmosphere with a TGA Q 50 thermogravimetric analyzer. CHN analysis was done by LECO Truspec.

### *2. General procedure for the synthesis of triazole*

A glass tube was charged with sodium ascorbate (30 mg, 10 mol%), phenyl acetylene (0.5mmol), benzylbromide (0.5 mmol), sodium azide (0.5 mmol), catalyst (5 mg, 0.5mol%) and  $\text{H}_2\text{O}/t\text{-BuOH}$  with 3/1 ratio (3 mL). The reaction mixture was stirred at 55 °C for 4 h and the completion of the reaction was monitored by TLC (EtOAc/ n-hexane, 25:75). In each case, after completion, the product was worked up and purified according to the following procedure: The mixture was diluted with ethyl acetate and water. The organic layer was washed with brine, dried over  $\text{MgSO}_4$  and concentrated under reduced pressure using a rotary evaporator. The residue was purified by recrystallization from ethyl acetate/ n-hexane. In order to reuse the catalyst, the nanomagnetic Cu catalyst was collected using an external magnet, washed with methanol and dried overnight to be ready for the next run.

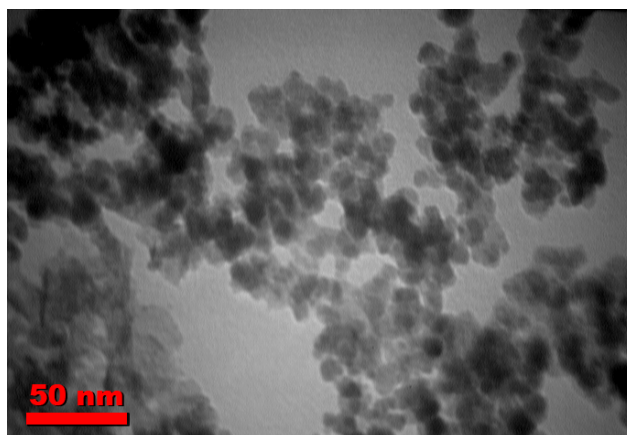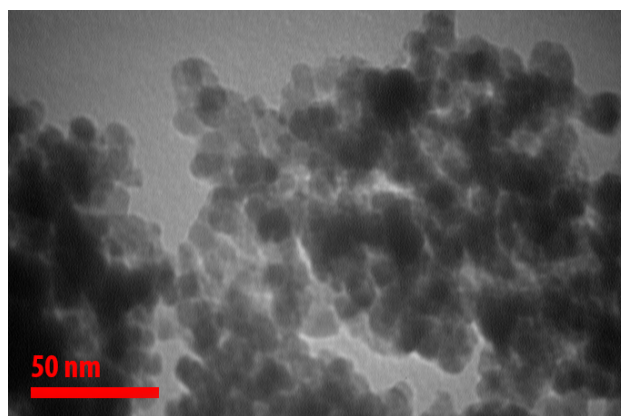

TEM image before and after catalyst recovery

### Spectroscopic characterization of the products

#### **1-Phenyl-2-(4-phenyl-1*H*-1,2,3-triazol-1-yl)ethanone<sup>1</sup>:**

Colourless solid; <sup>1</sup>H NMR (400 MHz, CDCl<sub>3</sub>) δ = 5.93 (s, 2H), 7.36-7.90 (m, 6H), 8.01 (d, *J* = 7.2 Hz, 2H); 8.04 (s, 1H); 8.06 (d, *J* = 7.2 Hz, 2H); <sup>13</sup>C NMR (100 MHz, CDCl<sub>3</sub>) δ = 55.4, 121.4, 125.8, 128.2, 128.8, 129.2, 130.5, 133.9, 134.6, 148.2, 190.2

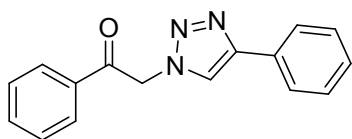

**4-Phenyl-(1,2,3-triazole-1-yl)-acetic acid ethyl ester:**

$^1\text{H}$  NMR (400 MHz,  $\text{CDCl}_3$ )  $\delta$  = 1.33 (3H, t,  $J$  = 7.6 Hz), 4.26 (2H, q,  $J$  = 7.6 Hz), 5.20 (2H, s), 7.34-7.46 (3H, m), 7.85-7.87 (2H, m, ortho to Ar), 7.93 (1H, s);  $^{13}\text{C}$  NMR (100 MHz,  $\text{CDCl}_3$ )  $\delta$  = 14.0, 50.9, 62.4, 121.0, 125.8, 128.3, 128.8, 130.3, 148.2, 166.3;

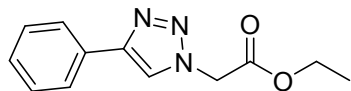**1-(4-bromobenzyl)-4-phenyl-1H-1,2,3-triazole<sup>1</sup>:**

$^1\text{H}$  NMR (400 MHz,  $\text{CDCl}_3$ )  $\delta$  = 5.69 (2H, s), 7.31-7.36 (1H, m), 7.40-7.44 (4H, m), 7.76 (s, 1 H), 7.81 (2H, d,  $J$  = 6.8 Hz), 8.22 (2H, d,  $J$  = 6.8 Hz);  $^{13}\text{C}$  NMR (100 MHz,  $\text{CDCl}_3$ )  $\delta$  = 53.1, 119.7, 124.0, 124.2, 125.7, 128.4, 128.5, 128.8, 130.0, 141.7, 148.0, 148.6

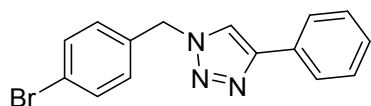**1-allyl-4-pentyl-1H-1,2,3-triazole:**

$^1\text{H}$  NMR (400 MHz,  $\text{CDCl}_3$ )  $\delta$  = 1.28 (3H, t), 1.32-1.37 (2H, m), 1.35-1.36 (4H, m), 1.67 (2H, t), 2.27 (2H, t), 4.92 (2H, d), 5.26-5.36 (2H, m), 5.97-6.05 (1H, m), 7.46 (1H, s);  $^{13}\text{C}$  NMR (100 MHz,  $\text{CDCl}_3$ )  $\delta$  = 13.8, 22.4, 25.6, 29.6, 30.9, 31.4, 119.7, 120.4, 130.0, 148.7

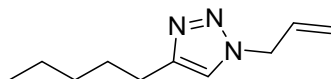**2-(4-phenyl-1H-1,2,3-triazol-1-yl)acetamide:**

White solid, mp 102-104°C;  $^1\text{H}$  NMR (400 MHz,  $\text{CDCl}_3$ )  $\delta$  = 1.62 (2H, broad), 5.93 (2H, s), 7.28 (1H, s), 7.40-7.40 (2H, m), 7.83-7.99 (3H, m, ortho to Ar);  $^{13}\text{C}$  NMR (100 MHz,  $\text{CDCl}_3$ )  $\delta$  = 29.70, 109.64, 115.73, 118.78, 126.11, 128.98, 144.50, 185.11

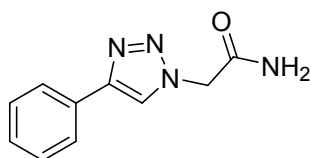**1-(4-bromobenzyl)-4-pentyl-1H-1,2,3-triazole:**

$^1\text{H}$  NMR (400 MHz,  $\text{CDCl}_3$ )  $\delta$  = 0.85 (3H, t,  $J$  = 6.9 Hz), 1.27-1.30 (4 H, m), 1.59-1.63 (2H, m), 2.65 (2H, t,  $J$  = 7.4 Hz), 5.41 (2H, s), 7.09 (2H, d,  $J$  = 6.3 Hz), 7.21 (1H, s), 7.46 (2H, d,

$J = 6.3$  Hz);  $^{13}\text{C}$  NMR (100 MHz,  $\text{CDCl}_3$ )  $\delta = 13.9, 22.3, 25.6, 29.0, 13.9, 22.3, 25.6, 29.0, 31.4, 53.2, 120.5, 122.6, 129.5, 132.1, 134.0$

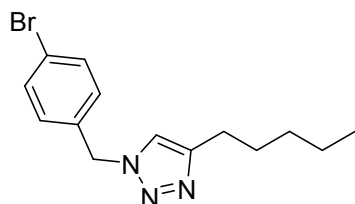

**1-Benzyl-4-pentyl-1H-1,2,3-triazole<sup>2</sup>:**

$^1\text{H}$  NMR (400 MHz,  $\text{CDCl}_3$ )  $\delta = 0.87$  (3H, t,  $J = 6.9$  Hz), 1.29-1.33 (4H, m), 1.61-1.65 (2H, m), 2.67 (2H, t,  $J = 7.4$  Hz), 5.49 (2H, s), 7.17 (1H, s), 7.25 (2H, d,  $J = 8.0$  Hz), 7.34-7.38 (3H, m);  $^{13}\text{C}$  NMR (100 MHz,  $\text{CDCl}_3$ )  $\delta = 13.9, 22.3, 25.6, 29.0, 31.4, 53.9, 120.4, 127.9, 128.5, 129.0, 135.0, 148.9$

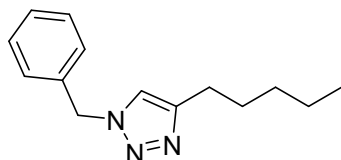

**1-(3-methylbut-2-en-1-yl)-4-phenyl-1H-1,2,3-triazole:**

$^1\text{H}$  NMR (400 MHz,  $\text{CDCl}_3$ )  $\delta = 1.81$  (6H, s), 4.97 (2H, d,  $J = 7.2$  Hz), 5.46 (1H, t,  $J = 7.2$  Hz), 7.28-7.36 (3H, m), 7.73 (1H, s), 7.82-7.85 (2H, m);  $^{13}\text{C}$  NMR (100 MHz,  $\text{CDCl}_3$ )  $\delta = 18.1, 25.7, 48.1, 117.2, 119.2, 126.7, 128.1, 128.8, 139.9, 147.7$

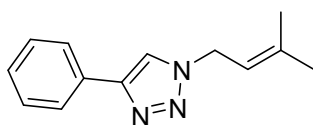

**1-propyl-4-phenyl-1H-1,2,3-triazole<sup>2</sup>:**

White solid, mp 62-64°C,  $^1\text{H}$  NMR (400 MHz,  $\text{CDCl}_3$ )  $\delta$ : 0.99 (3H, t,  $J = 7.3$ ), 1.97-2.02 (2H, m), 4.37 (2H, t,  $J = 7.3$ ), 7.26-7.34 (1H, m, Ar), 7.42 (2H, t, Ar), 7.74 (1H, s), 7.83 (2H, d);  $^{13}\text{C}$  NMR (100 MHz,  $\text{CDCl}_3$ )  $\delta = 11.5, 24.1, 51.9, 119.8, 126.1, 128.5, 129.2, 130.70, 147.61$

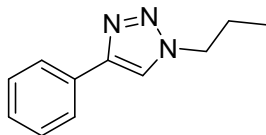

**1-(naphthalen-1-ylmethyl)-4-phenyl-1H-1,2,3-triazole:**

$^1\text{H}$  NMR (400 MHz,  $\text{CDCl}_3$ )  $\delta = 6.02$  (2H, s), 7.25-7.26 (2H, m), 7.33-7.34 (2H, m), 7.47-7.53 (4H, m), 7.72-7.74 (2H, m), 7.90 (2H, d,  $J = 5.2$ ), 8.00 (1H, d,  $J = 5.2$ );  $^{13}\text{C}$  NMR (100

MHz, CDCl<sub>3</sub>)  $\delta$  = 52.8, 119.8, 123.3, 125.7, 126.0, 126.8, 127.8, 128.3, 128.5, 129.1, 129.3, 130.2, 130.5, 130.9, 131.6, 134.3

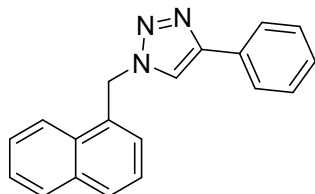

**1-allyl-4-phenyl-1H-1,2,3-triazole<sup>2</sup>:**

White solid, mp 58-60°C; <sup>1</sup>H NMR (400 MHz, CDCl<sub>3</sub>)  $\delta$ = 5.01-5.04 (2H, d, *J*=6.2 Hz), 5.33-5.40 (2H, dd, *J*=8 Hz & 16.86 Hz), 6.03-6.12 (1H, m), 7.28-7.44 (3H, m), 7.78 (1H, s), 7.82-7.85 (2H, d, Ar); <sup>13</sup>C NMR (100 MHz, CDCl<sub>3</sub>)  $\delta$ = 51.1, 119.9, 120.5, 126.1, 128.5, 129.2, 131.0, 131.7, 147.3

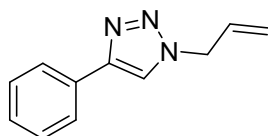

**1-benzyl-4-(4-nitrophenyl)-1H-1,2,3-triazole**

Yellow solid, mp: 166 °C. <sup>1</sup>H NMR (400 MHz, CDCl<sub>3</sub>):  $\delta$ = 5.61(2H, s), 7.33-7.43(5H, m), 7.81(1H, s), 7.96(2H, d, *J*=8.8 Hz), 8.23(2H, d, *J*=8.8 Hz); <sup>13</sup>C NMR (100 MHz, CDCl<sub>3</sub>):  $\delta$ = 54.4, 120.9, 124.2, 126.1, 128.2, 129.0, 129.3, 134.2, 136.8, 145.9, 147.3.

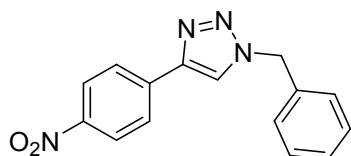

**1-benzyl-4-(4-methoxyphenyl)-1H-1,2,3-triazole**

White solid; <sup>1</sup>H NMR (400 MHz, DMSO-d<sub>6</sub>)  $\delta$ = 3.75 (3H, s), 5.59 (2H, s), 6.95 (2H, d, *J*= 10 Hz), 7.29-7.35 (4H, m), 7.27 (1H, d, *J*= 8.5), 8.24 (1H, s), 8.45 (1H, s); <sup>13</sup>C NMR (100 MHz, DMSO-d<sub>6</sub>)  $\delta$ = 53.6, 55.6, 114.7, 121.1, 123.8, 127.1, 128.4, 128.7, 129.3, 136.5, 147.2, 159.6.

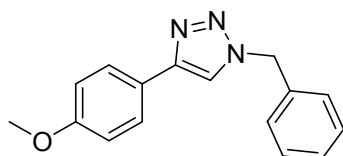

**1-benzyl-4-((2-nitrophenoxy)methyl)-1H-1,2,3-triazole**

White solid,  $^1\text{H}$  NMR (400 MHz,  $\text{CDCl}_3$ )  $\delta$  = 5.35 (2H, s), 5.53 (2H, s), 7.05-7.06 (1H, d,  $J$  = 7.4 Hz), 7.26-7.37 (6H, m), 7.53 (1H, d), 7.64 (1H, s), 7.82- 7.84 (1H, t);  $^{13}\text{C}$  NMR (100 MHz,  $\text{CDCl}_3$ )  $\delta$  = 54.7, 64.3, 115.9, 121.5, 123.5, 126.1, 128.5, 129.3, 129.6, 134.7, 140.6, 151.9

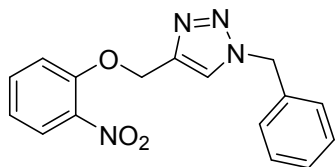

$^1\text{H}$ -NMR and  $^{13}\text{C}$ -NMR spectra of the products

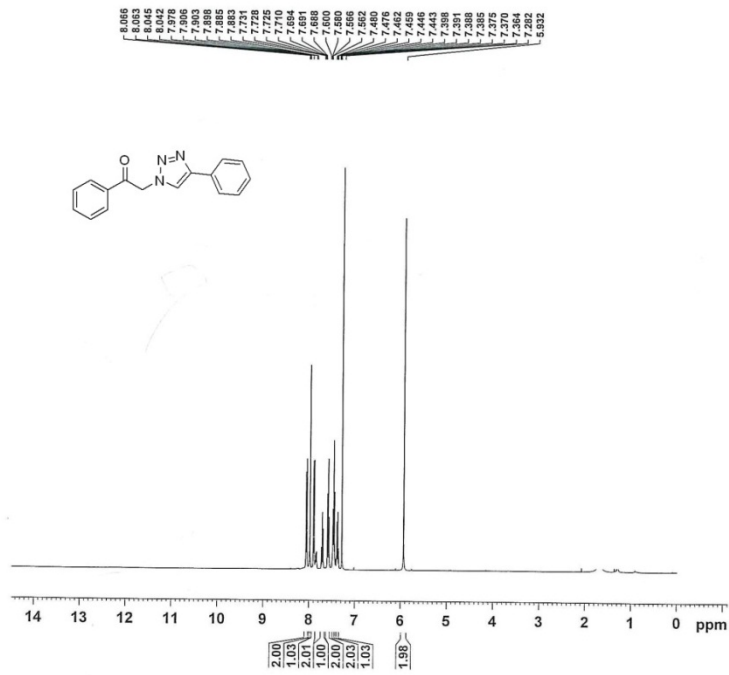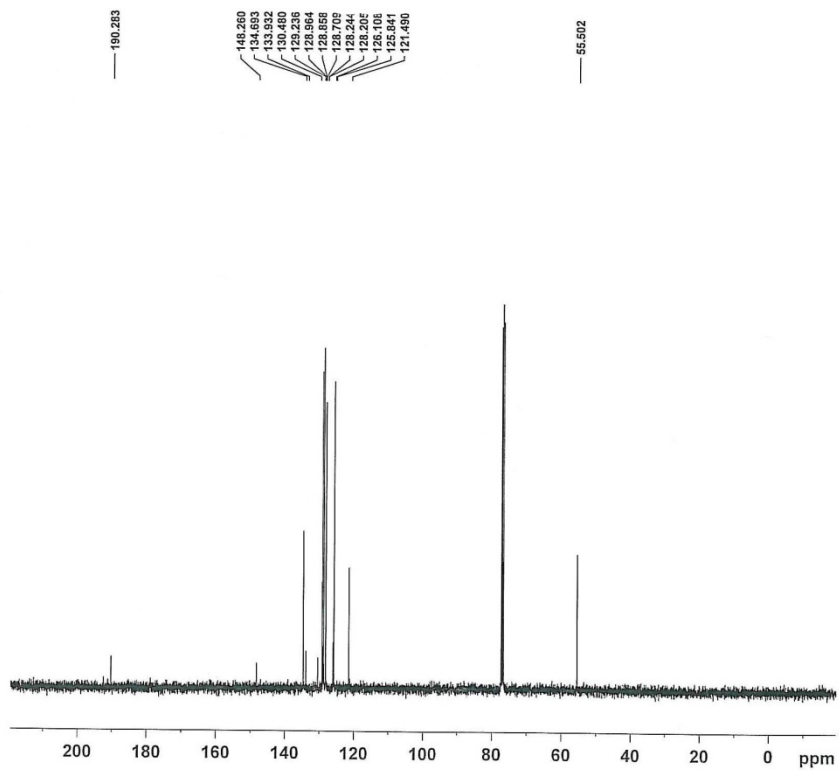



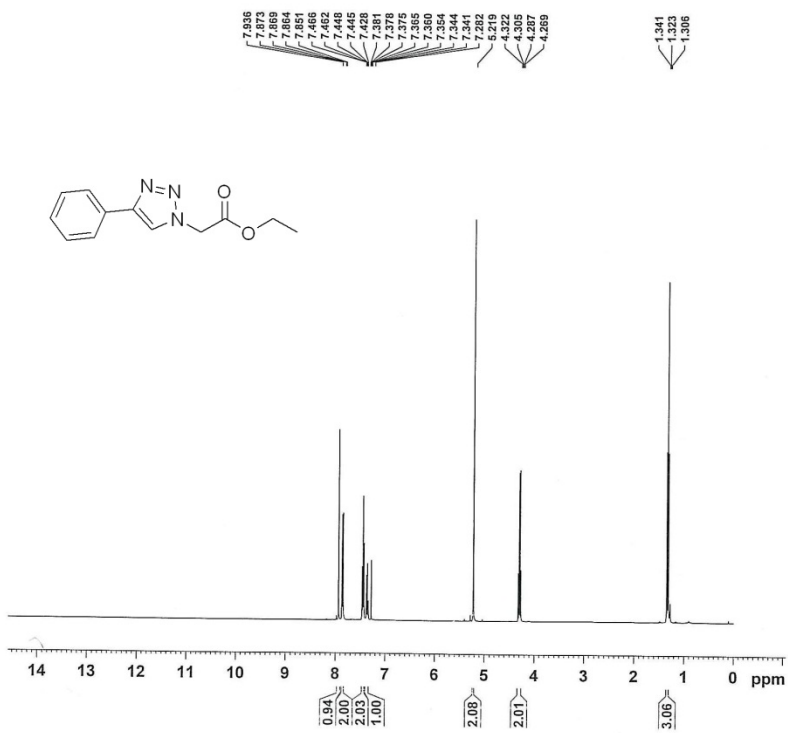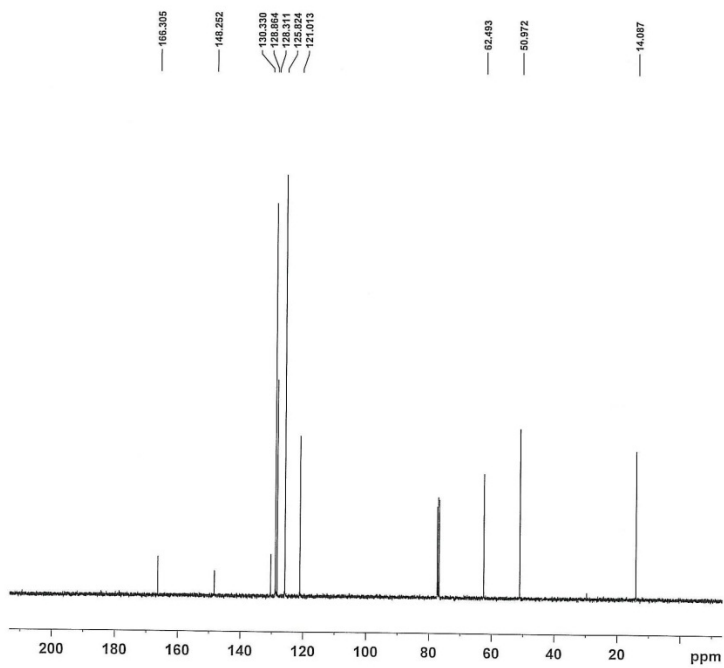

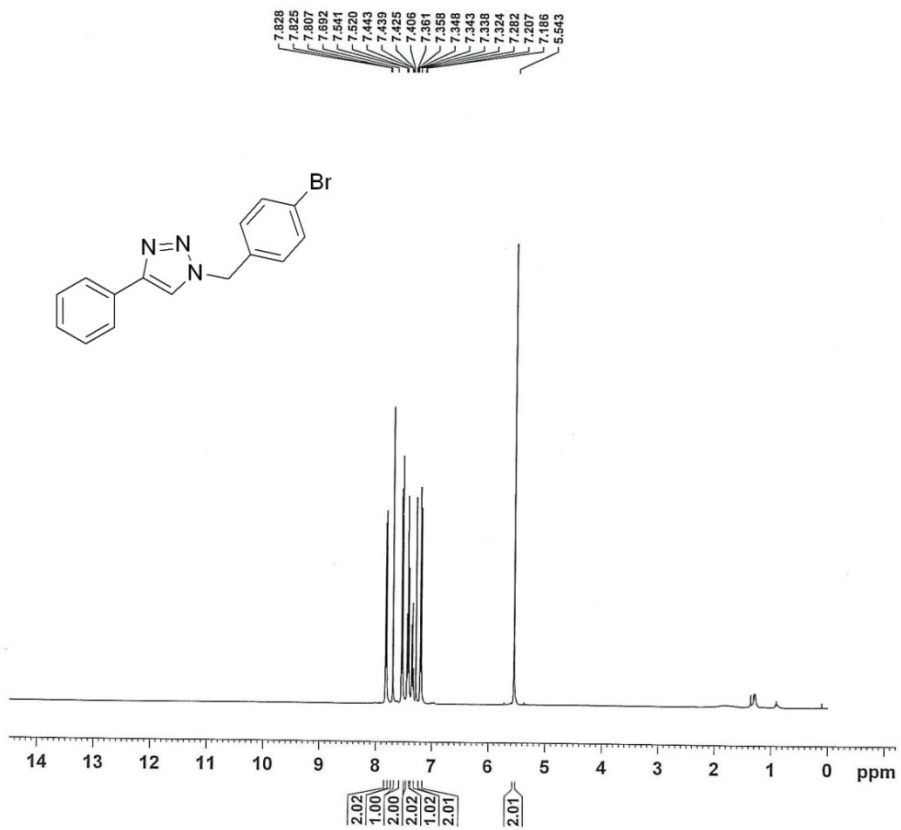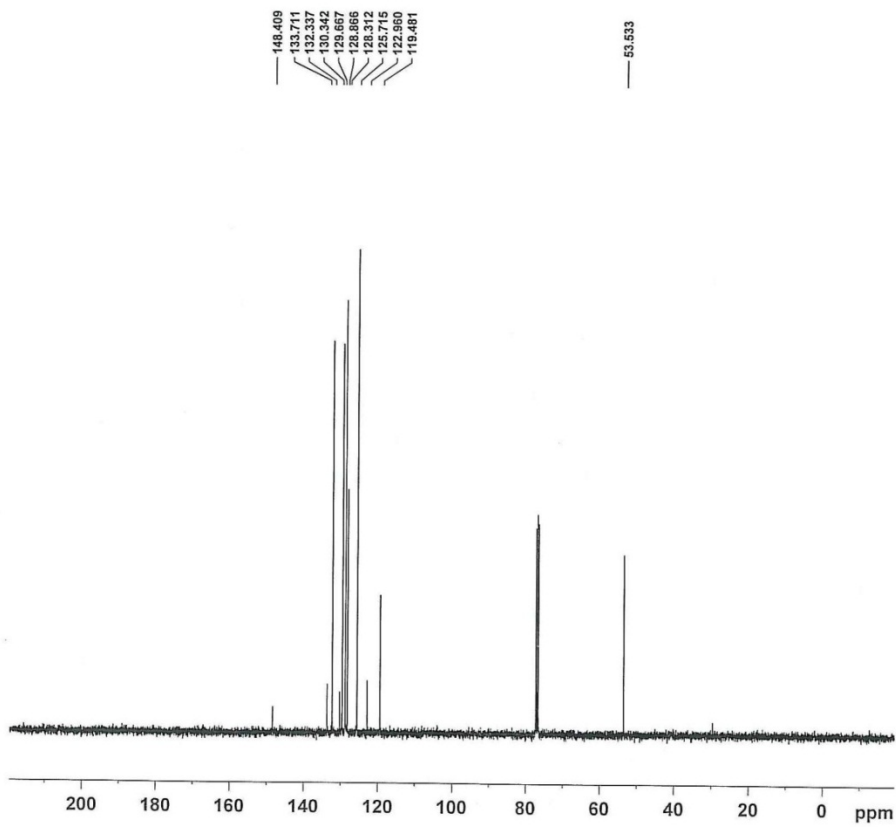

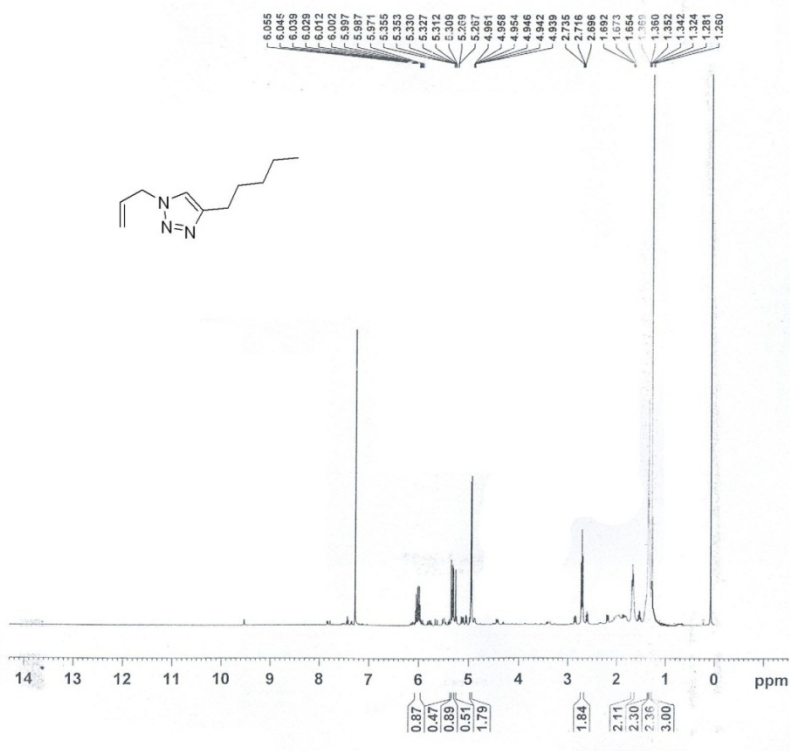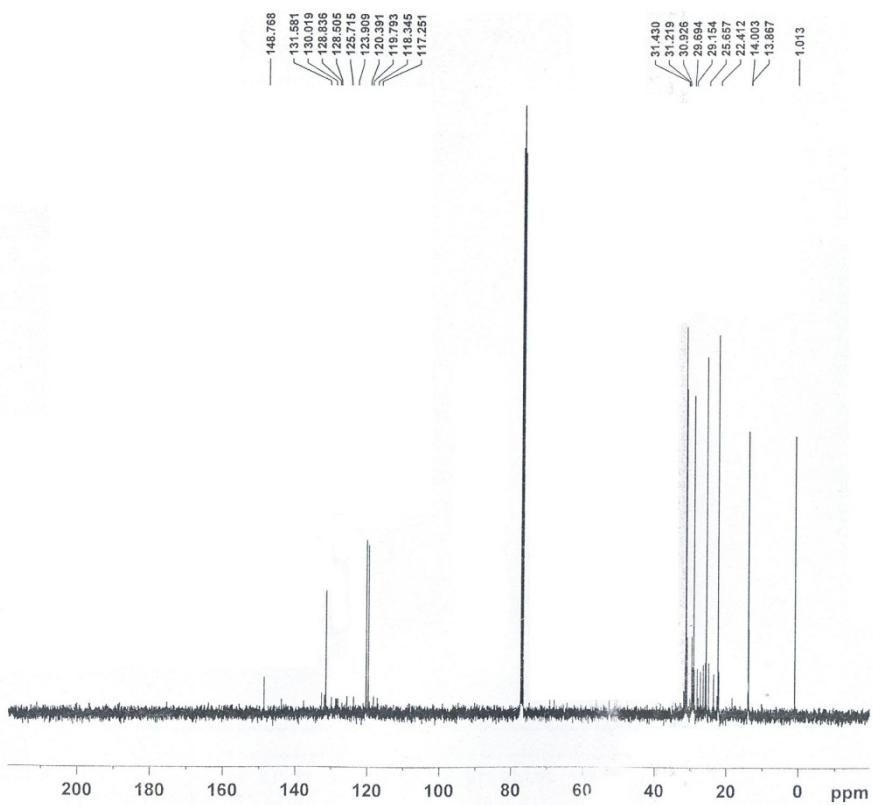

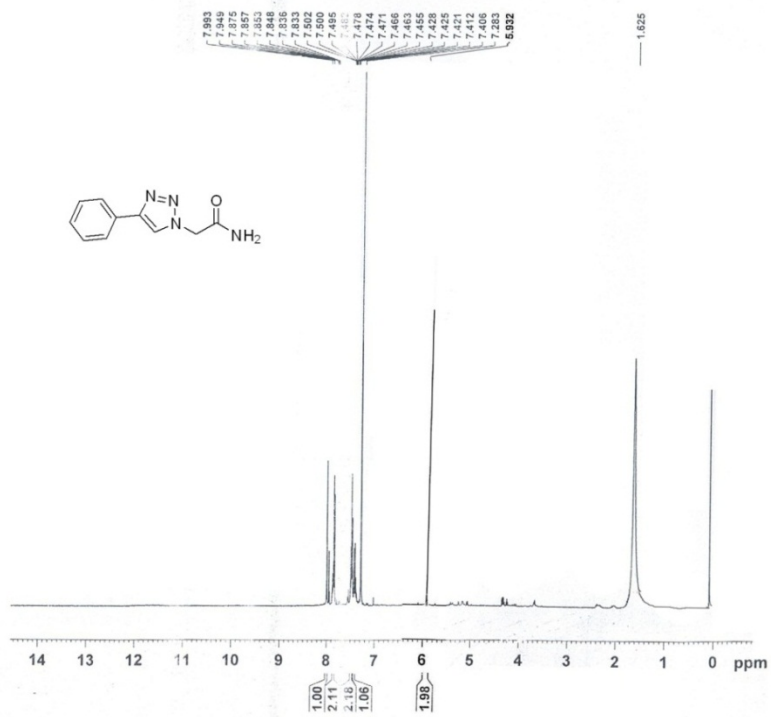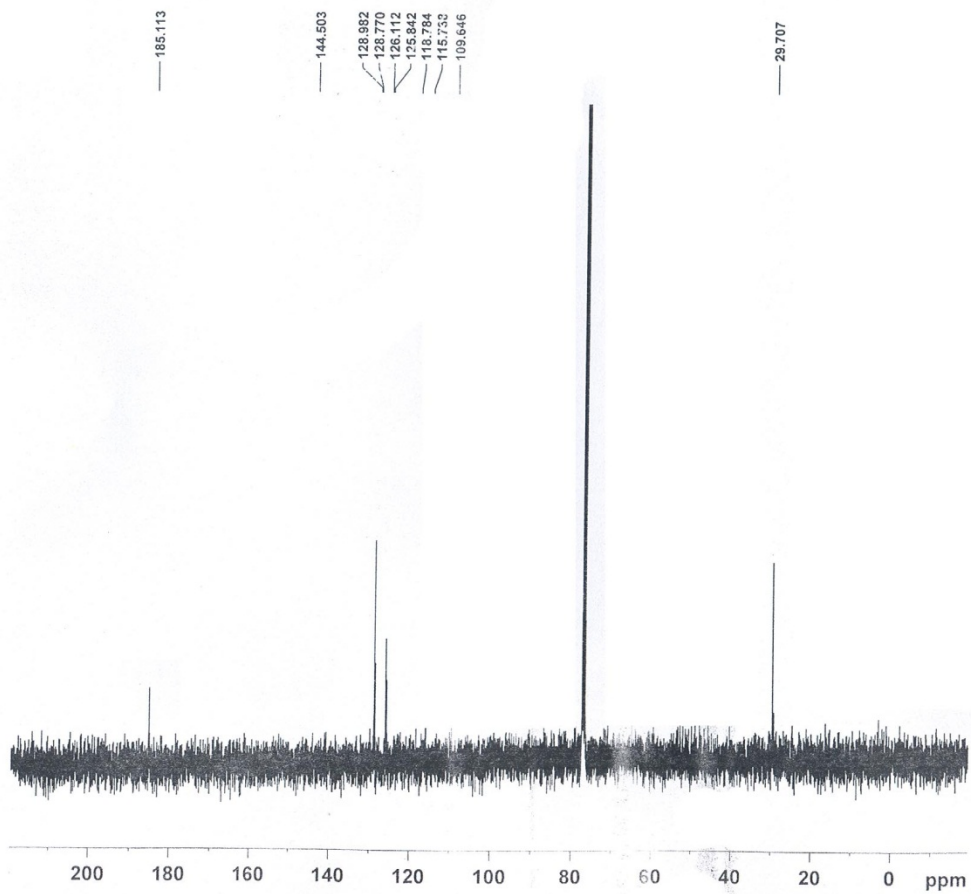

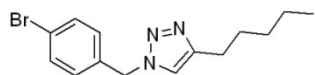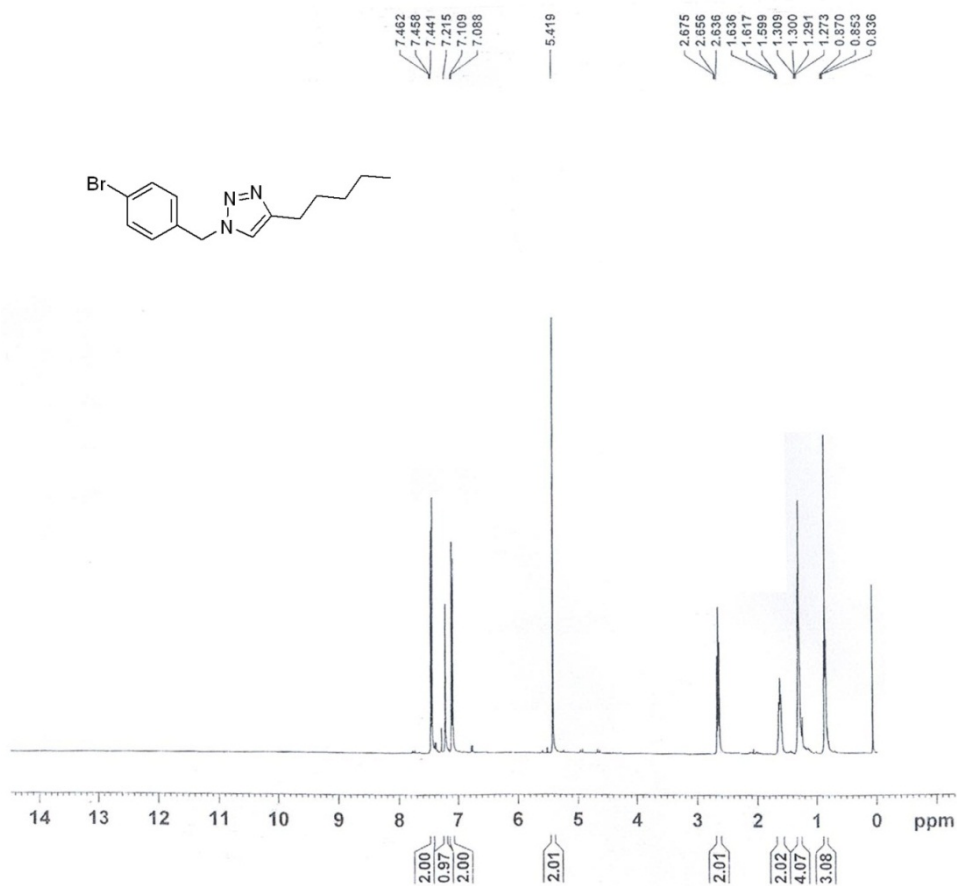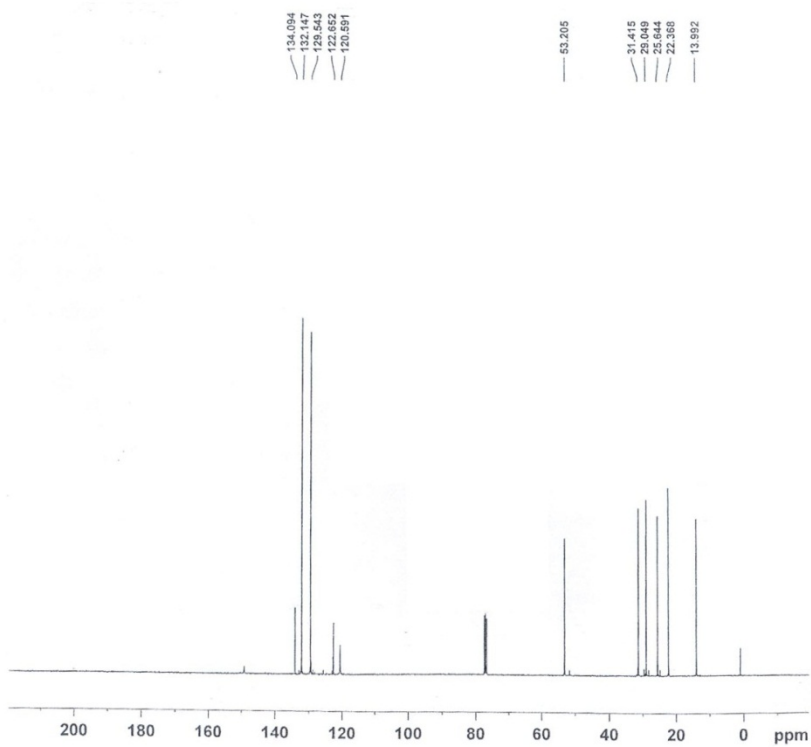

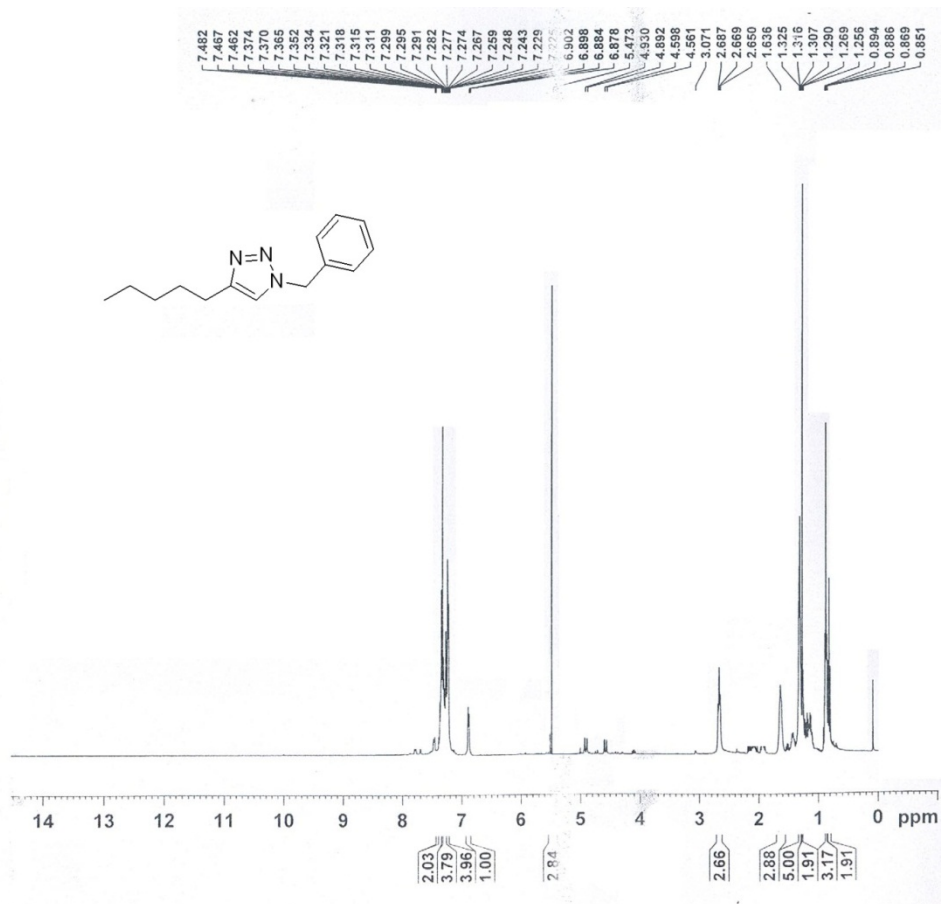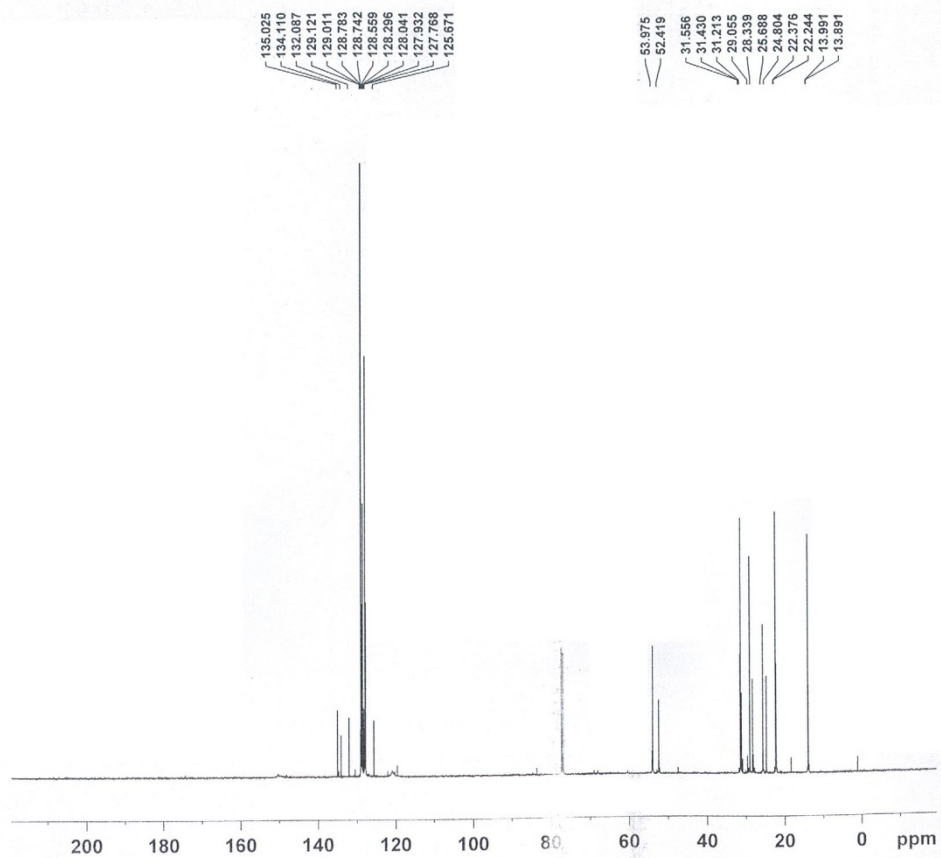

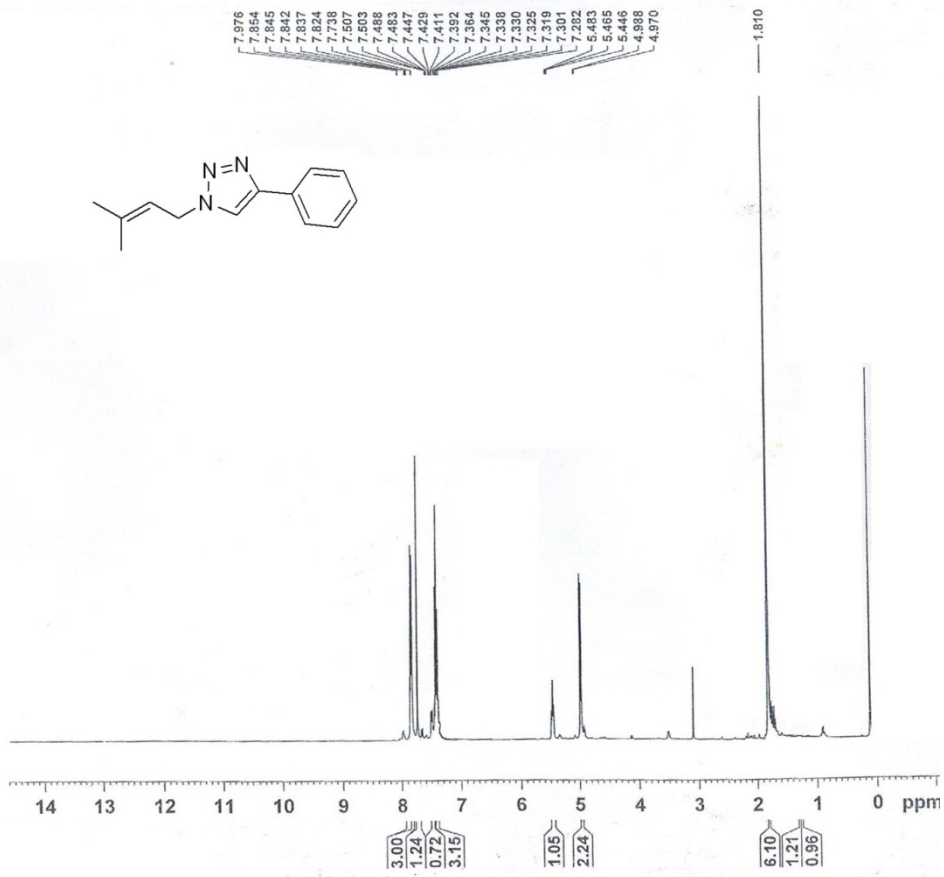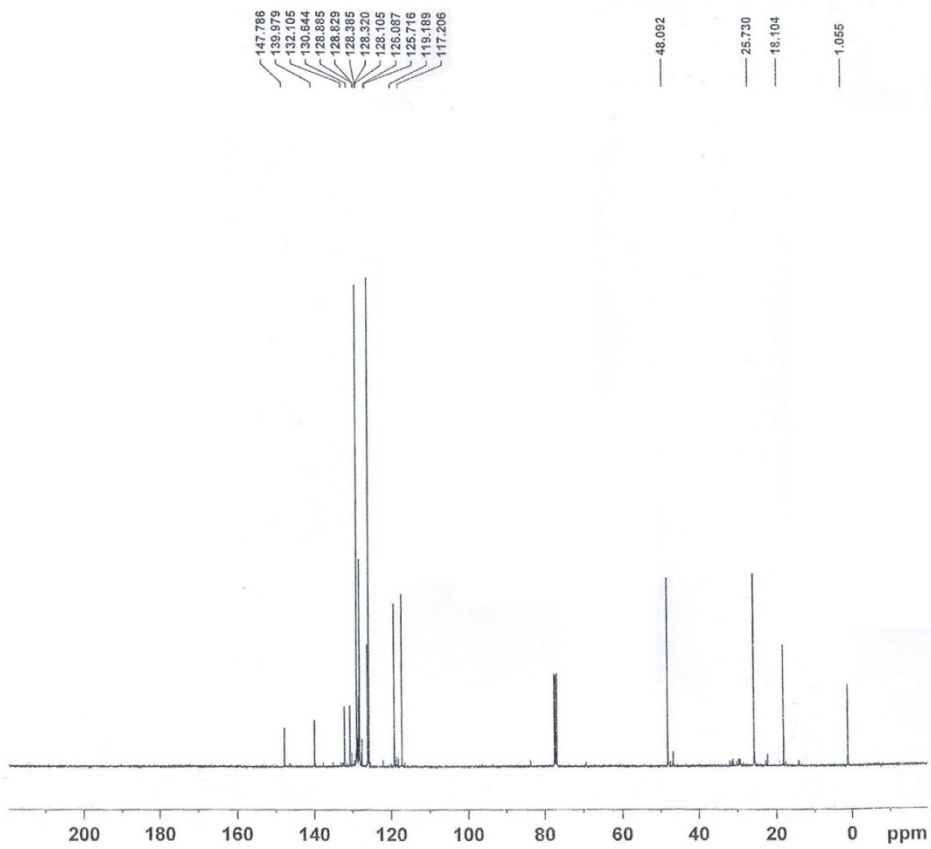

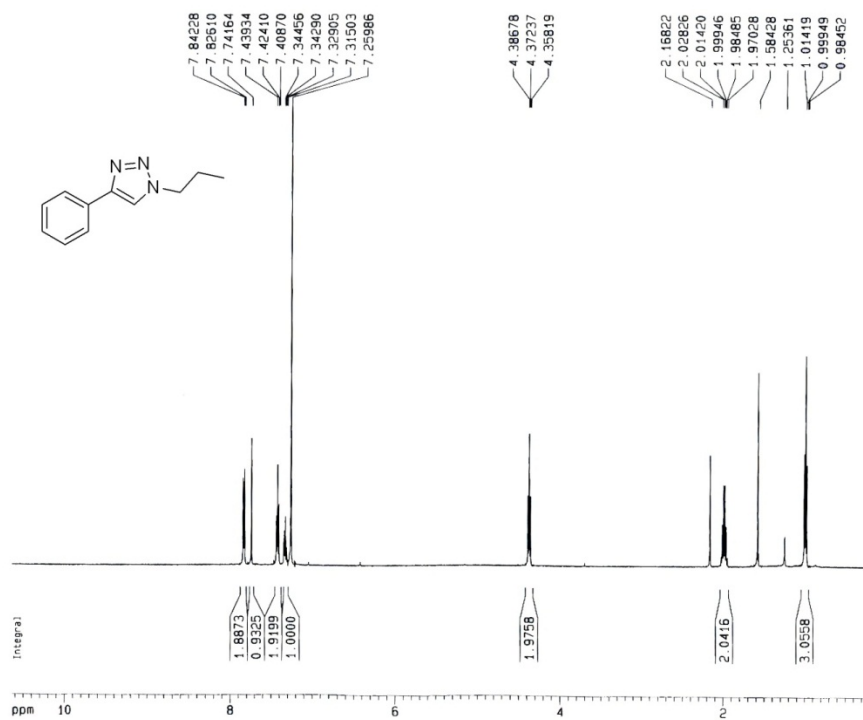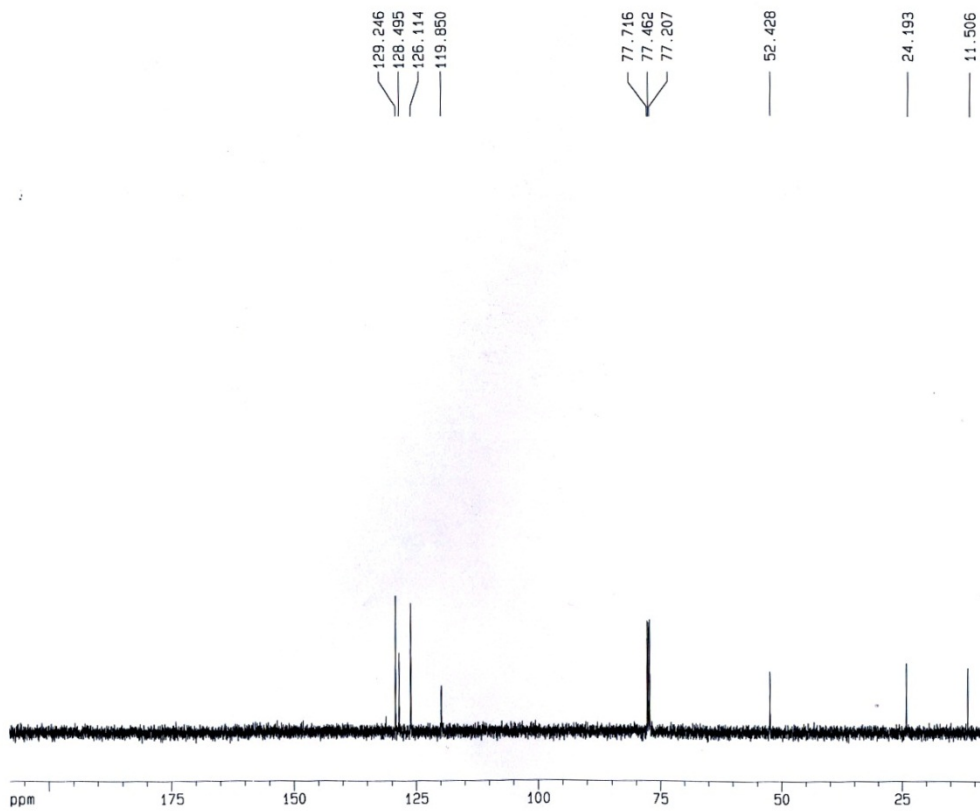



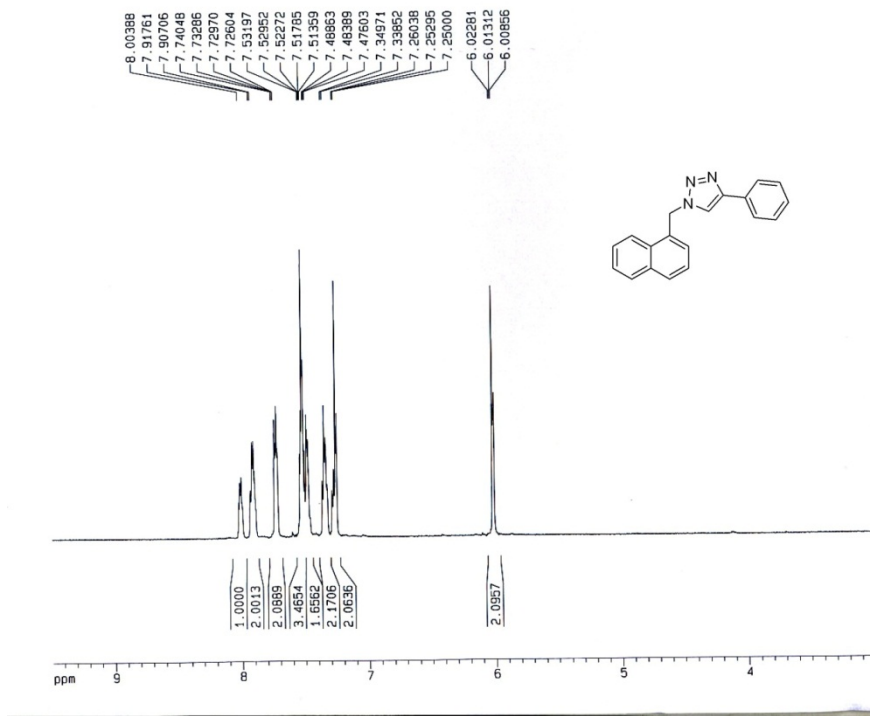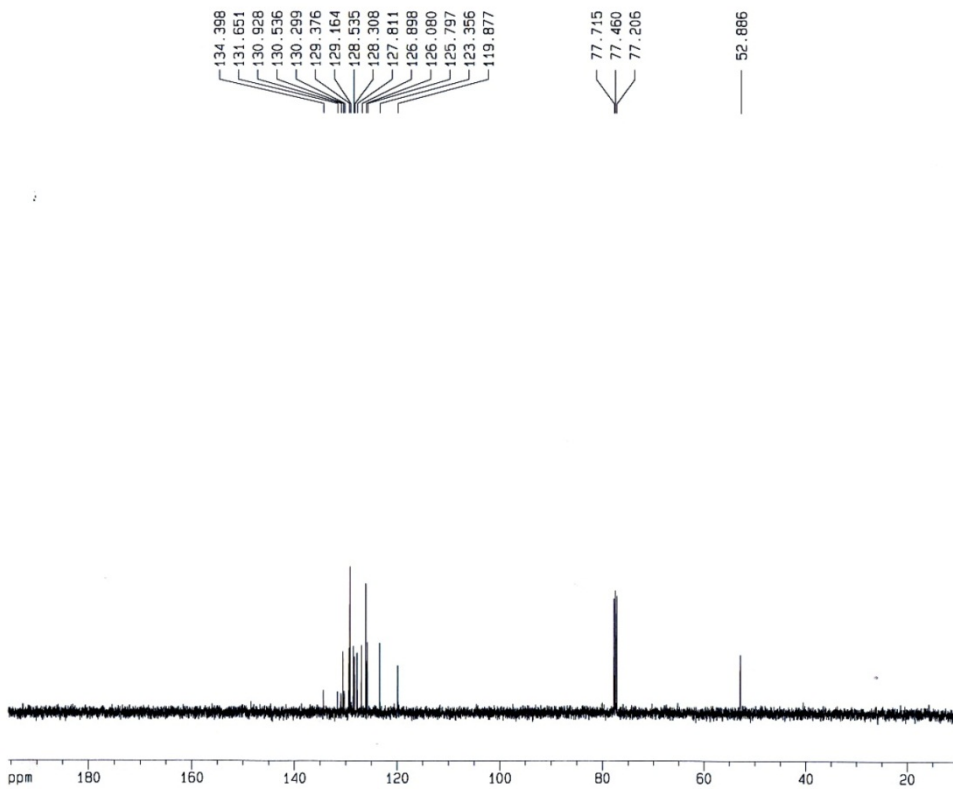

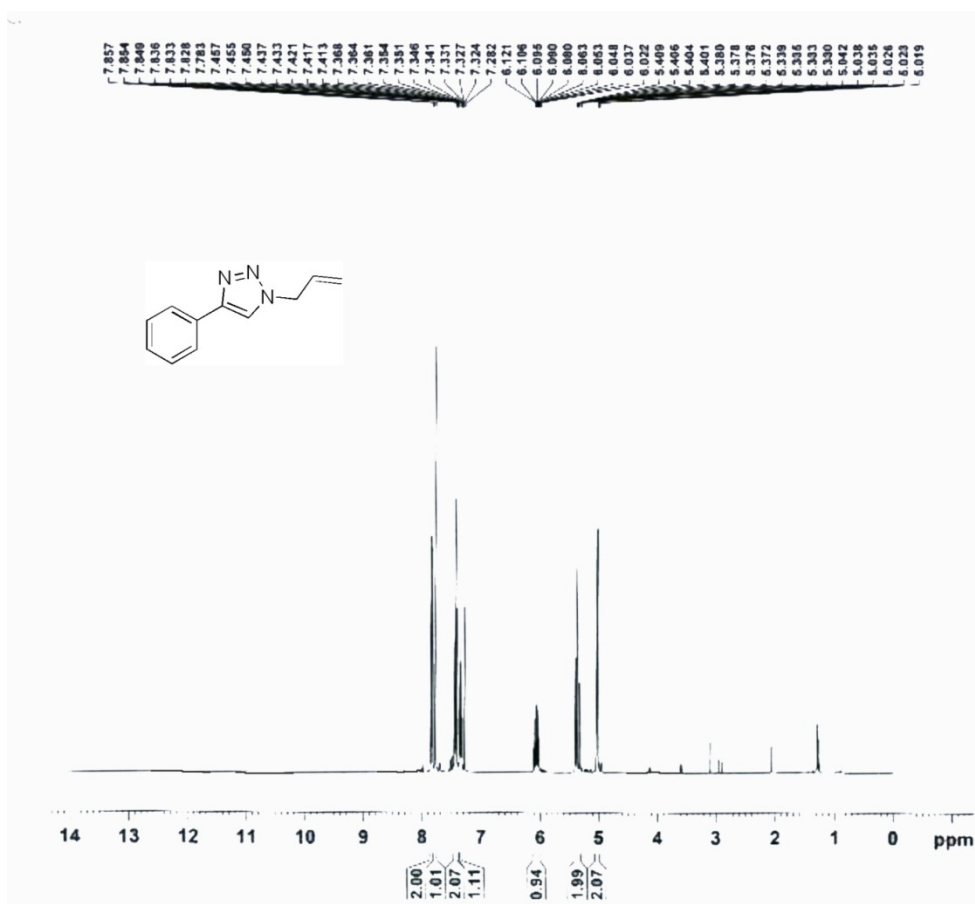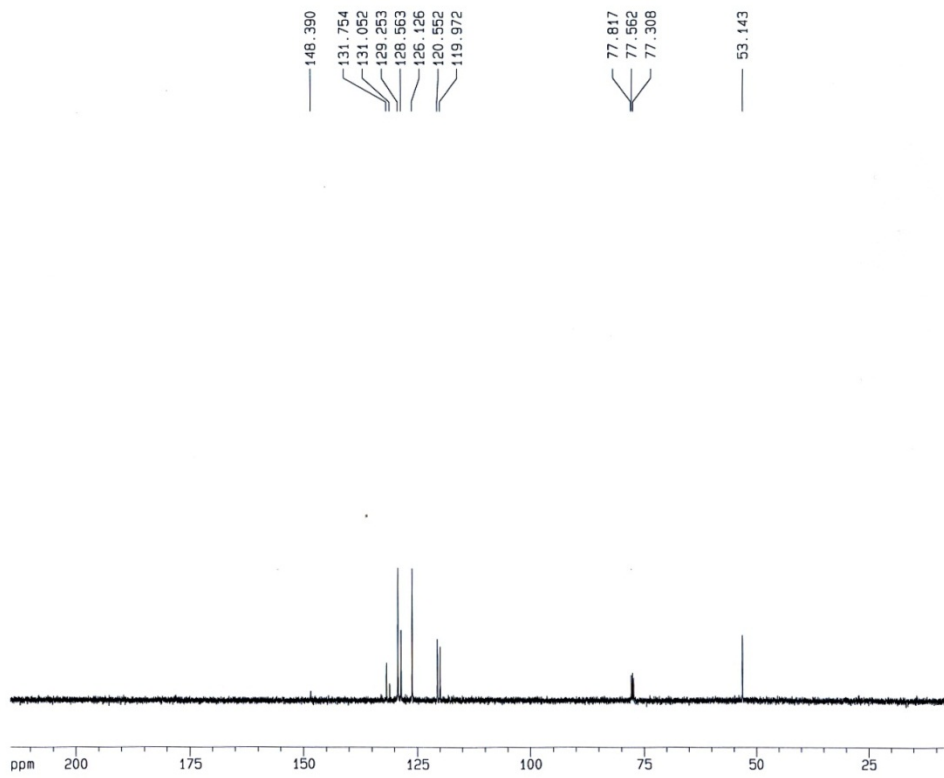

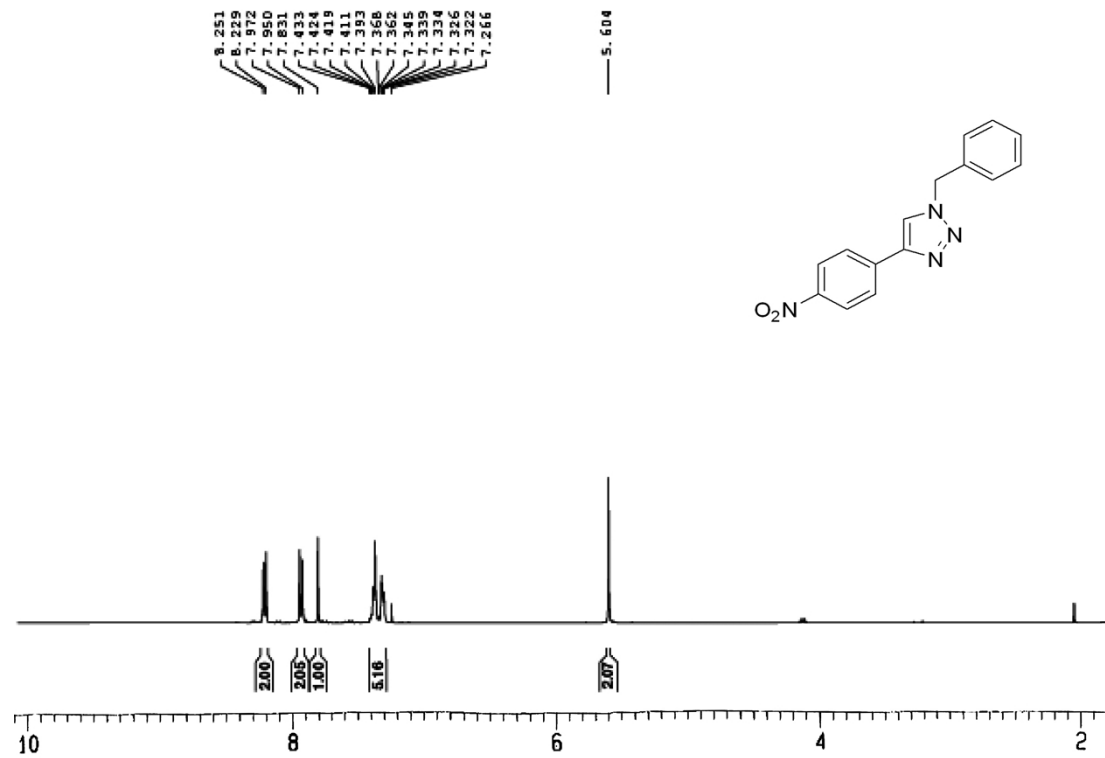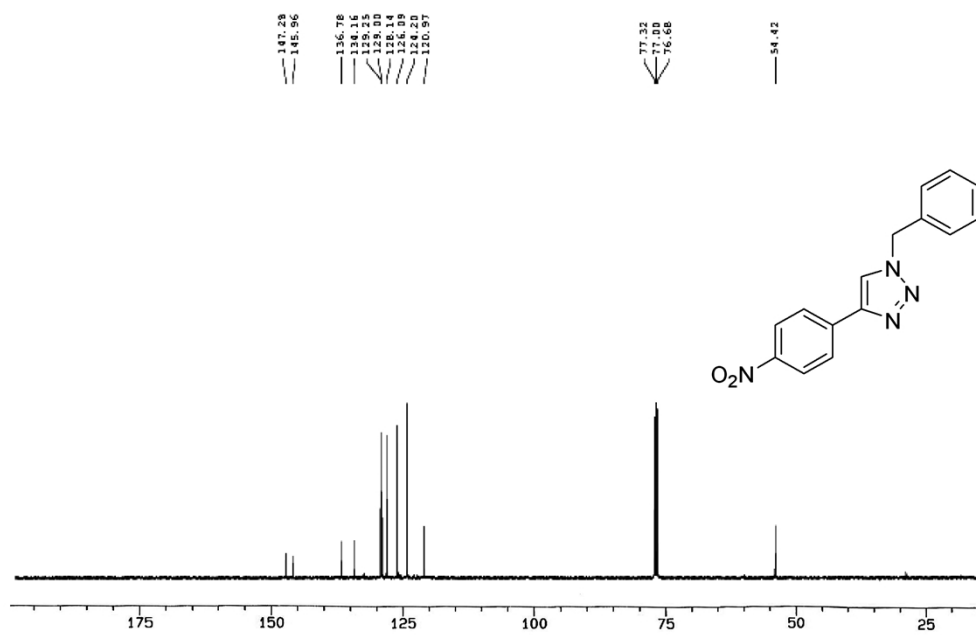

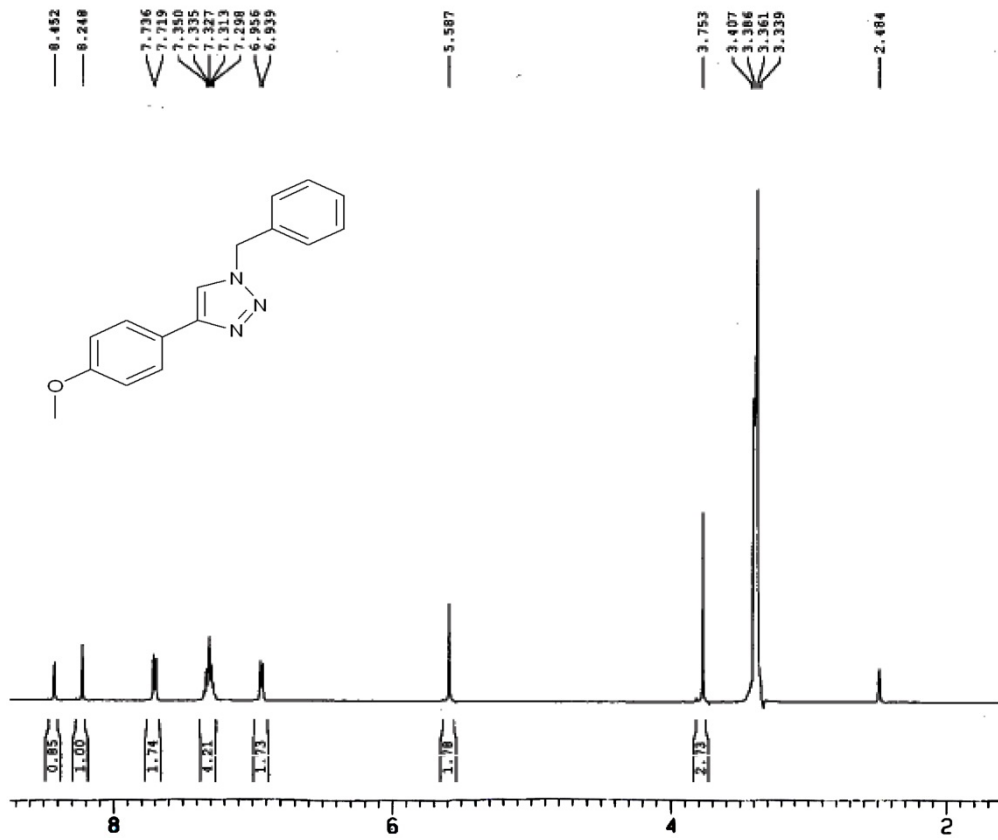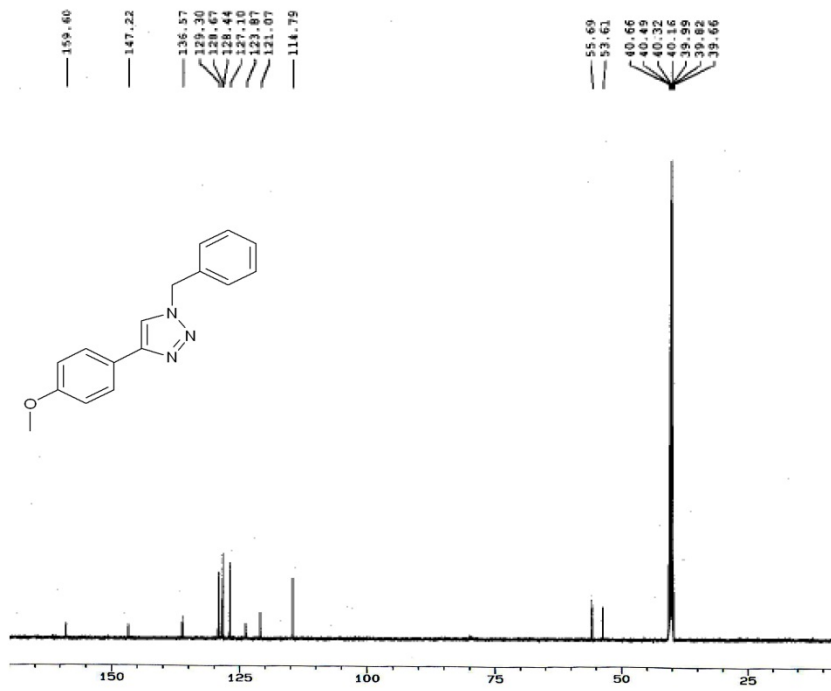

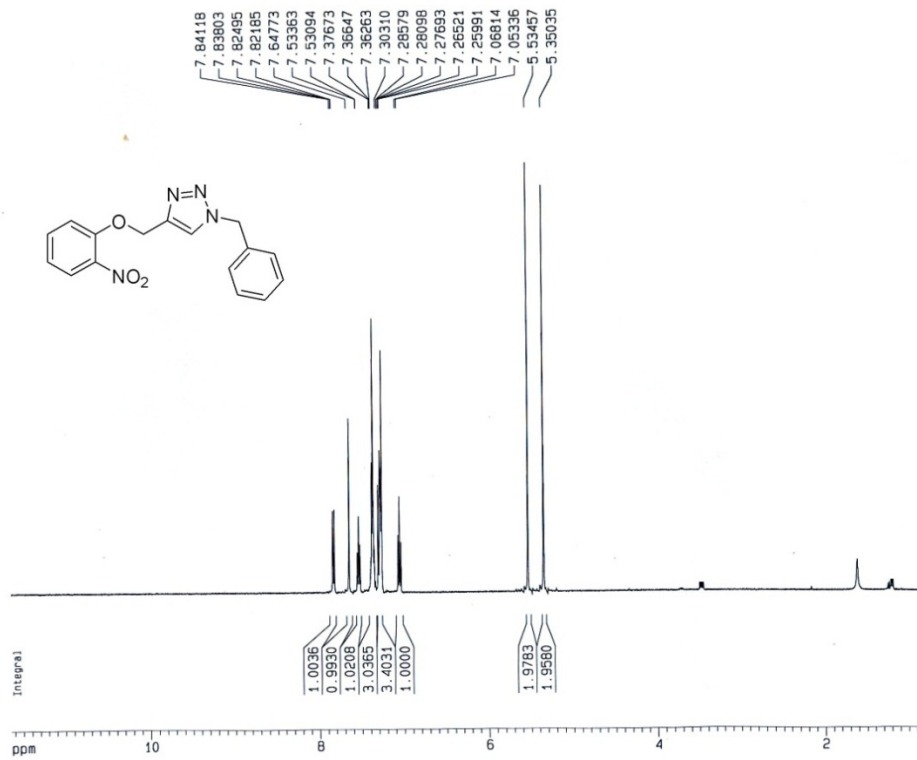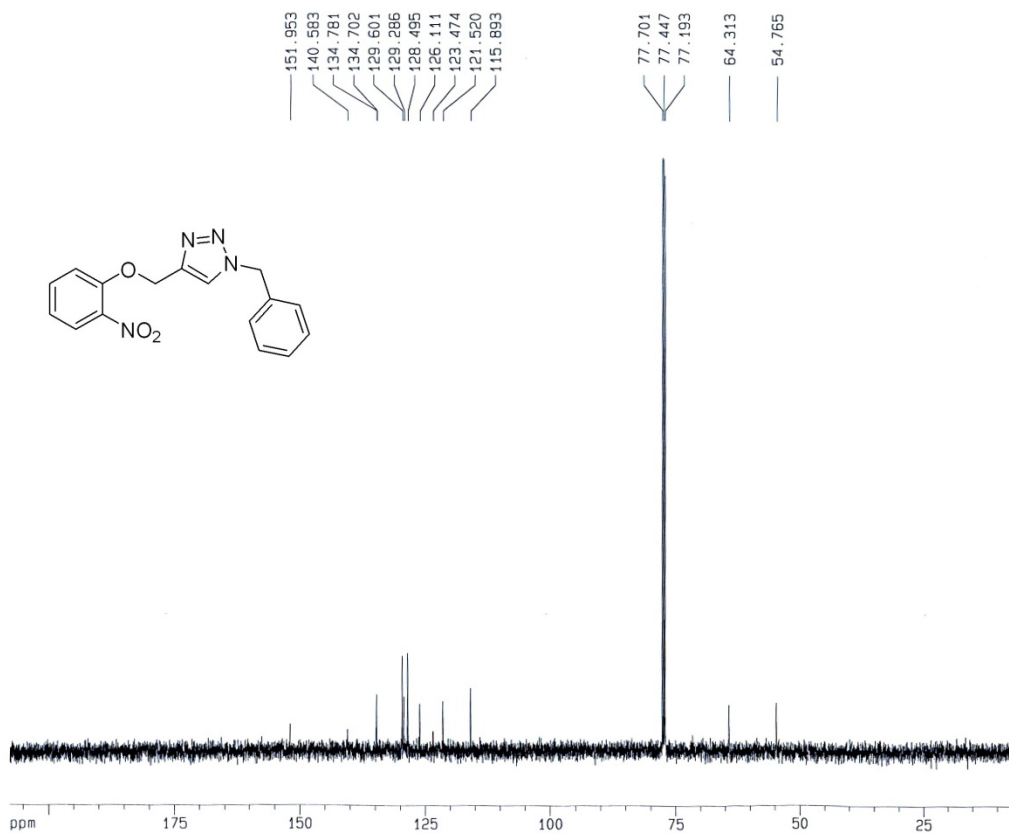

## References:

- [1] M. Boominathan, N. Pugazhenthiran, M. Nagaraj, S. Muthusubramanian, S. Murugesan, N. Bhuvanesh, *ACS Sus. Chem. Eng.*, 2013, **1**, 1415.
- [2] S. R. Kale, S. S. Kahandal, B. G. Manoj, R. V. Jayaram, *RSC Adv.*, 2013,**3**, 8184.
